# Supplementary material for: Preoperative 3D printing planning technology combined with orthopedic surgical robot-assisted minimally invasive screw fixation for the treatment of pelvic fractures: a retrospective study
Source: PeerJ. 2024 Dec 12;12:e18632. doi: 10.7717/peerj.18632 (PMC11646416; doi:10.7717/peerj.18632)
Supplement: Supplemental Information 1 [file peerj-12-18632-s001.xlsx]

## Sheet: Sheet1
group	gender	age	tile	Mean number of planning hours (from start of plotting - end of plotting) for front-loop screws	Mean duration of anterior loop screw placement (from start of guide pin placement - suture)	Mean number of anterior ring screw fluoroscopies (from the start of guide pin placement - suture)	Back loop screw planning time (from start of plotting - end of plotting)	Posterior ring screw placement duration (from start of guide pin placement - suture) Mean	Mean number of posterior loop screw fluoroscopies (from the start of guide pin placement - suture)	smith score	Interval between injury and surgery (days)	Length of surgical recording (min)
experimental group	male	66	C2	4	20	9	5	25	11	before0after0（2）	6	110
	female	52	B2	0	0	0	3	20	9	after0（2）	6	70
	male	49	B2	3	18	8	3	21	9	before0after0（2）	11	100
	female	46	B2	0	0	0	4	20	10	after0（2）	5	75
	female	19	B1	0	0	0	5	30	12	after0	10	80
	male	75	B3	0	0	0	3	20	10	after1after2	14	90
	female	49	B2	3	17	8	3	21	9	before0after0（2）	4	90
	male	42	B	3	18	8	0	0	0	before0	6	45
	male	43	B3	3	18	9	0	0	0	before0（2）	8	80
	female	24	C2	3	19	8	4	24	8	before1after0	4	100
	female	69	B2	3	18	8	0	0	0	before0	3	50
	female	57	B3	3	17	8	3	20	9	before0（2）after0	5	105
	male	31	C3	0	0	0	3	22	10	after0	12	50
	male	64	C1	0	0	0	5	24	11	after0（2）	4
	female	54	B2	3	19	8	0	0	0	before0	6
	male	47	B2	3	18	9	4	22	10	before0after0（2）	10
	female	48	B2	4	18	9	3	21	9	before1after0（2）	8
	female	21	B1	0	0	0	4	24	10	after0（2）	9
	male	73	B3	3	20	8	3	20	8	before0after0（2）	6
	female	47	B2	4	18	8	0	0	0	before0（2）	4
	male	44	B	3	19	9	0	0	0	before0	6
	male	41	B2	3	18	8	0	0	0	before0（2）	5
	female	22	C1	0	0	0	4	23	11	after1after0	9
group	gender	age	tile	Mean number of planning hours (from start of plotting - end of plotting) for front-loop screws	Mean duration of anterior loop screw placement (from start of guide pin placement - suture)	Mean number of anterior ring screw fluoroscopies (from the start of guide pin placement - suture)	Back loop screw planning time (from start of plotting - end of plotting)	Posterior ring screw placement duration (from start of guide pin placement - suture) Mean	Mean number of posterior loop screw fluoroscopies (from the start of guide pin placement - suture)	smith score	Interval between injury and surgery (days)	Length of surgical recording (min)
control group	female	61	B2	0	0	0	4	20	9	after1（2）	6	60
	female	67	B2	4	19	8	0	0	0	before1	5	50
	female	63	B2	4	20	10	0	0	0	before1	7	60
	female	24	A2.3	4	24	10	0	0	0	before1	3	60
	female	56	B2	3	20	9	0	0	0	before2	6	50
	male	33	A2.3	4	19	9	0	0	0	before0（2）	6	80
	male	33	B2	0	0	0	4	21	9	after0（2）	13	75
	male	44	C1	3	18	8	0	0	0	before0	9	45
	male	44	A2.2	3	19	9	0	0	0	before0	7	50
	male	63	B	4	20	10	0	0	0	before0	3	55
	female	65	B1	4	22	9	4	30	11	before0after0+after2	8	120
	male	39	C3	4	21	10	5	22	10	before0（2）after0（2）	6	120
	male	47	B2	3	20	10	4	21	9	before1after0（2）	6	95
	male	50	B3	0	0	0	4	20	9	after1+after2	5	70
	female	29	B3	4	28	12	4	22	10	before0after0（2）	8	110
	male	44	B3	4	20	10	4	23	10	before1after0	12	80
	female	61	B2	4	20	9	4	24	11	before0after0（2）	6
	female	26	B2	3	19	10	0	0	0	before0	7
	male	54	C1	0	0	0	5	23	10	after0（2）	10
	male	31	B2	4	17	9	4	23	9	before0after0（2）	9
	female	32	B2	4	25	9	0	0	0	before1（2）	8
	male	46	B3	3	17	8	4	26	11	before0after1（2）	5
	male	41	B2	0	0	0	5	20	9	after0（2）	6
	female	61	B	4	19	8	0	0	0	before0	5
	male	65	B1	0	0	0	5	22	10	after1after0	4
	male	27	C1	0	0	0	4	24	11	after0（2）	11
